# Supplementary material for: Phase Ib/II Trial of Ribociclib in Combination with Binimetinib in Patients with NRAS -mutant Melanoma
Source: Oxford University Press journal article supplement (doi:10.1158/1078-0432.ccr-21-3872), 2022-03-16
Supplement: ccr-21-3872_figure_s3_supps3.docx [file ccr-21-3872_figure_s3_supps3.docx]

**Supplemental** **Figure S3.** Summary of the most commonly altered genes at baseline.

1. Summary of the most commonly altered genes at baseline in patients enrolled in all phases of the study with >10 total alterations visualized by patient using Oncoprint (1).
2. Summary of the most commonly altered genes in patients enrolled in all phases of the study with >10 total alterations. This includes copy number alterations, sort variants, and rearrangements of known, likely, and unknown significance.


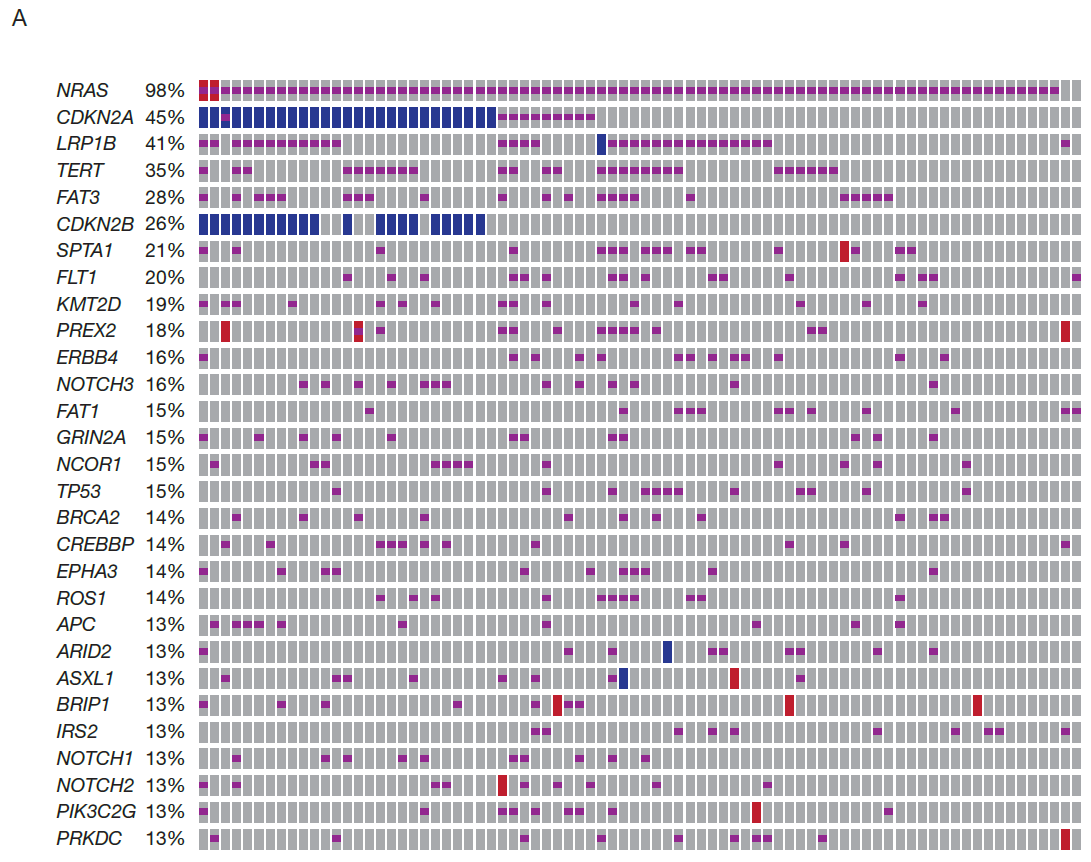


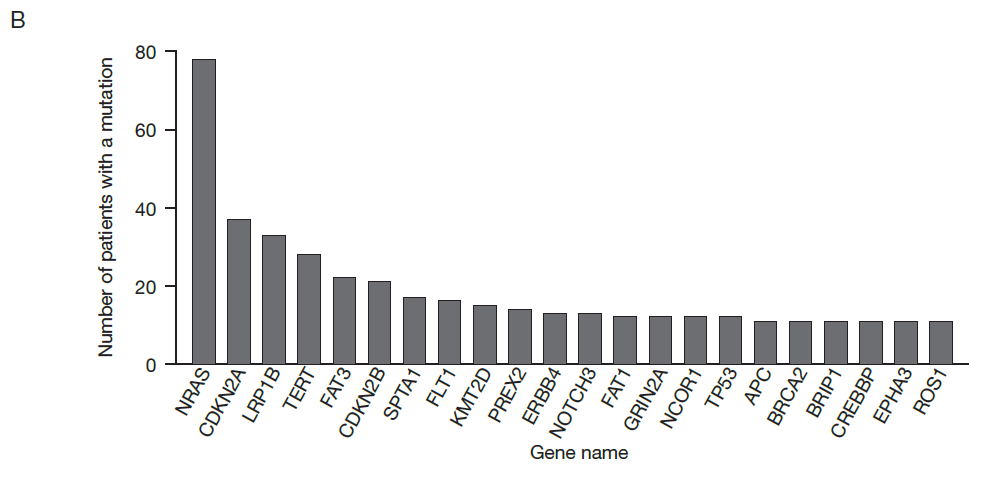


**REFERENCE**

1. He Y, Zhou J, Ma S, Nie Y, Yue D, Jiang Q*, et al.* Multi-responsive "turn-on" nanocarriers for efficient site-specific gene delivery in vitro and in vivo. *Adv Healthc Mater* **2016**;5:2799-812.
