# Supplementary material for: Phase Ib/II Trial of Ribociclib in Combination with Binimetinib in Patients with NRAS -mutant Melanoma
Source: Oxford University Press journal article supplement (doi:10.1158/1078-0432.ccr-21-3872), 2022-03-16
Supplement: ccr-21-3872_table_s2_suppts2.docx [file ccr-21-3872_table_s2_suppts2.docx]

**Supplemental Table S2.** Summary of response rates for patients with Q61X and G12X/G13X mutations.

|  | **Q61**  **(*n* = 70)** | **G12 or G13**  **(*n* = 8)** |
| --- | --- | --- |
| Number of responders | 16 | 1 |
| Response rate, % (95% CI) | 22.9 (14.6–34.0) | 12.5 (2.2–47.1) |

Abbreviations: CI, confidence interval.
