# Supplementary material for: Phase Ib/II Trial of Ribociclib in Combination with Binimetinib in Patients with NRAS -mutant Melanoma
Source: Oxford University Press journal article supplement (doi:10.1158/1078-0432.ccr-21-3872), 2022-03-16
Supplement: ccr-21-3872_table_s3_suppts3.docx [file ccr-21-3872_table_s3_suppts3.docx]

**Supplemental Table S3.** Alterations in genes in MAPK and D-cyclin-CDK4/6-INK4a-Rb pathways in addition to *NRAS*.

|  | **Gene symbol** | **Total (*n*)** | **Unique patients** |
| --- | --- | --- | --- |
| MAPK signaling pathway | *KRAS* | 4 | 12 |
| *HRAS* | 1 |
| *BRAF*V600E/K | 0 |
| Other *BRAF* mutations | 8 |
| Cell cycle pathway | *CDKN2A* | 39 | 40 |
| *CDK4* | 5 |
| *CCND1* | 5 |
