# Supplementary figures and images for: Phase Ib/II Trial of Ribociclib in Combination with Binimetinib in Patients with NRAS -mutant Melanoma
Source: Oxford University Press journal article supplement (doi:10.1158/1078-0432.ccr-21-3872), 2022-03-16

**Supplemental Figure S1.** Swimmer plot for (**A**) phase II responders and (**B**) all phase II patients.


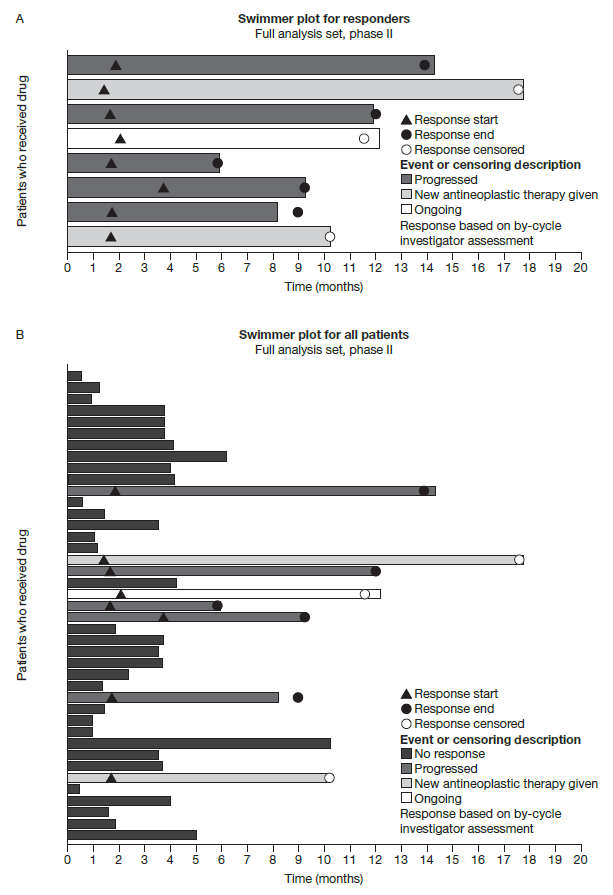

Supplement: ccr-21-3872_figure_s1_supps1.docx [file ccr-21-3872_figure_s1_supps1.docx]
